# Supplementary material for: Metformin-treated cancer cells modulate macrophage polarization through AMPK-NF-κB signaling
Source: PubMed Central journal article supplement (PMC5400538; doi:10.18632/oncotarget.14982), 2017-02-01
Supplement: oncotarget-08-20706-s001.pdf [file oncotarget-08-20706-s001.pdf]

# Metformin-treated cancer cells modulate macrophage polarization through AMPK-NF-κB signaling

## Supplementary Materials

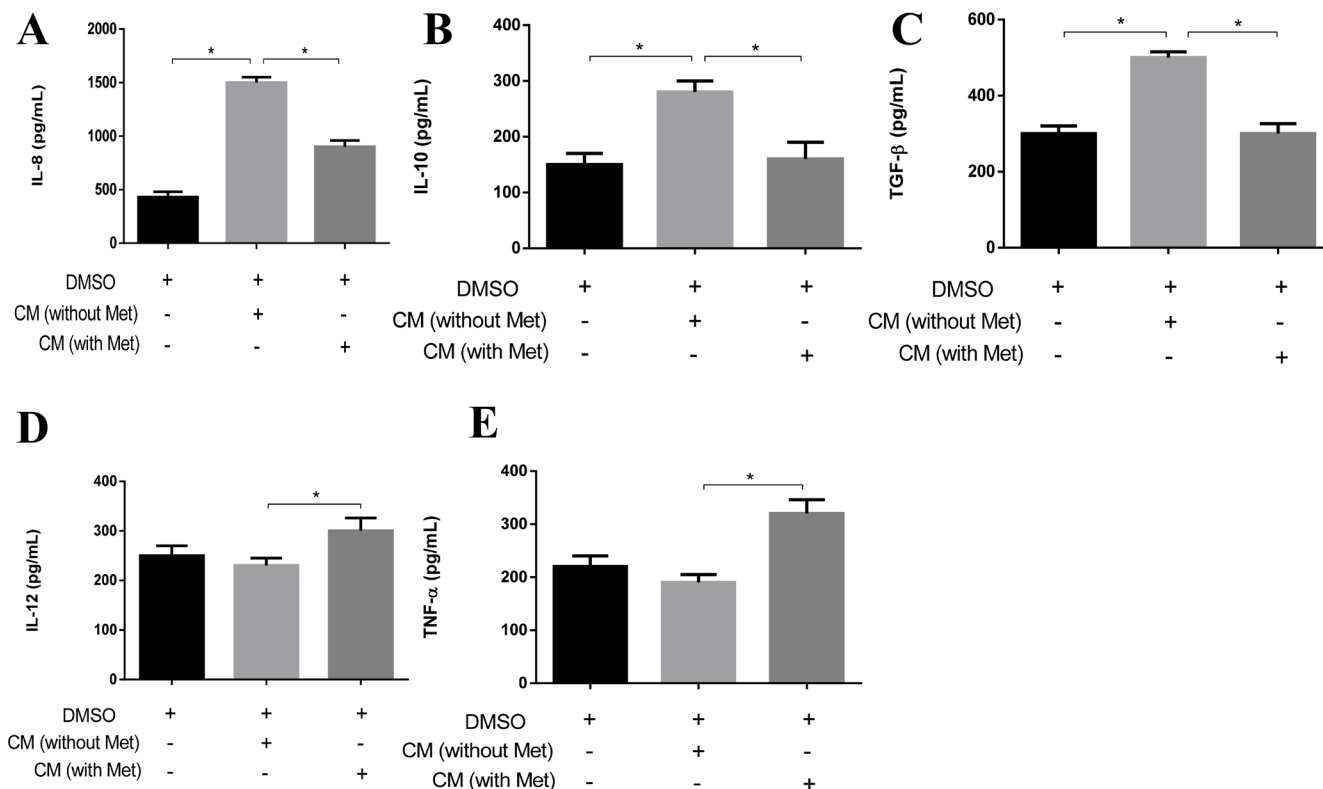

**Supplementary Figure 1: Metformin treated cancer increased M1 cytokine and decreased M2 cytokine expression in macrophage.** THP-1 cells were stimulated with PMA (200 nM) for 24 h, then incubated with breast cancer conditioned medium (CM) with or without metformin (60 μM) for 6 h, followed by ELISA analysis of IL-8, IL-10, TGF-β, IL-12 and TNF-α secretions (A–E). Data are expressed as mean ± SD, \**p* < 0.05. DMSO: control; Met: metformin. Representative ELISA data shown are from experiments independently performed at least three times.

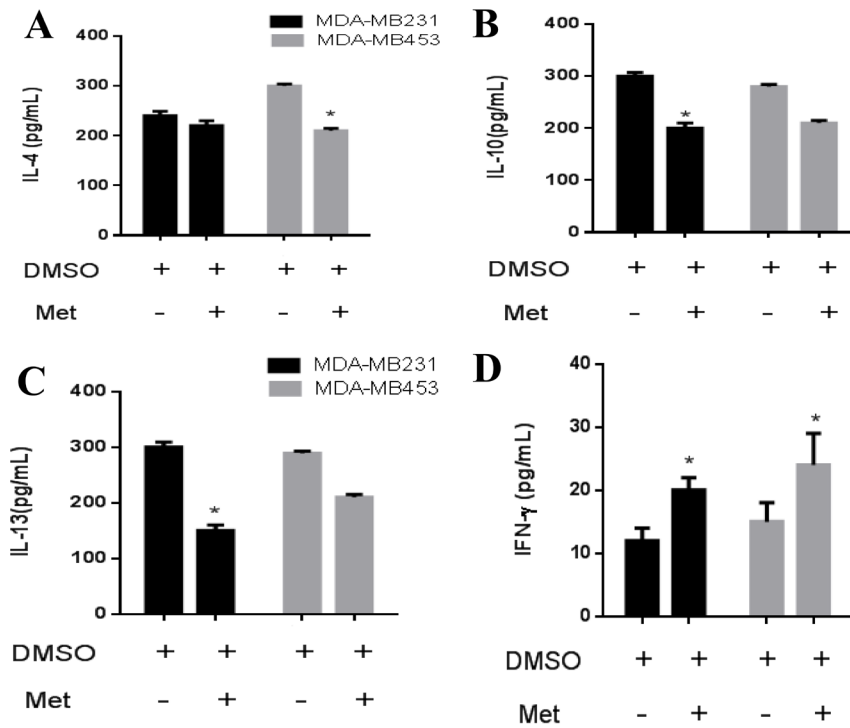

**Supplementary Figure 2: Metformin decreased IL-4, IL-10, IL-13 and increased IFN- $\gamma$  expression in breast cancer cells.** Breast cancer cells (MDA-MB231/MDA-MB453) were treated with metformin (60  $\mu$ M) for 6 h, followed by analysis of the secretion of IL-4, IL-10, IL-13 and IFN- $\gamma$  using ELISA (A–D). Data are expressed as mean  $\pm$  SD, \* $p$  < 0.05. DMSO: control; Met: metformin. Representative ELISA data shown are from experiments independently performed at least three times.

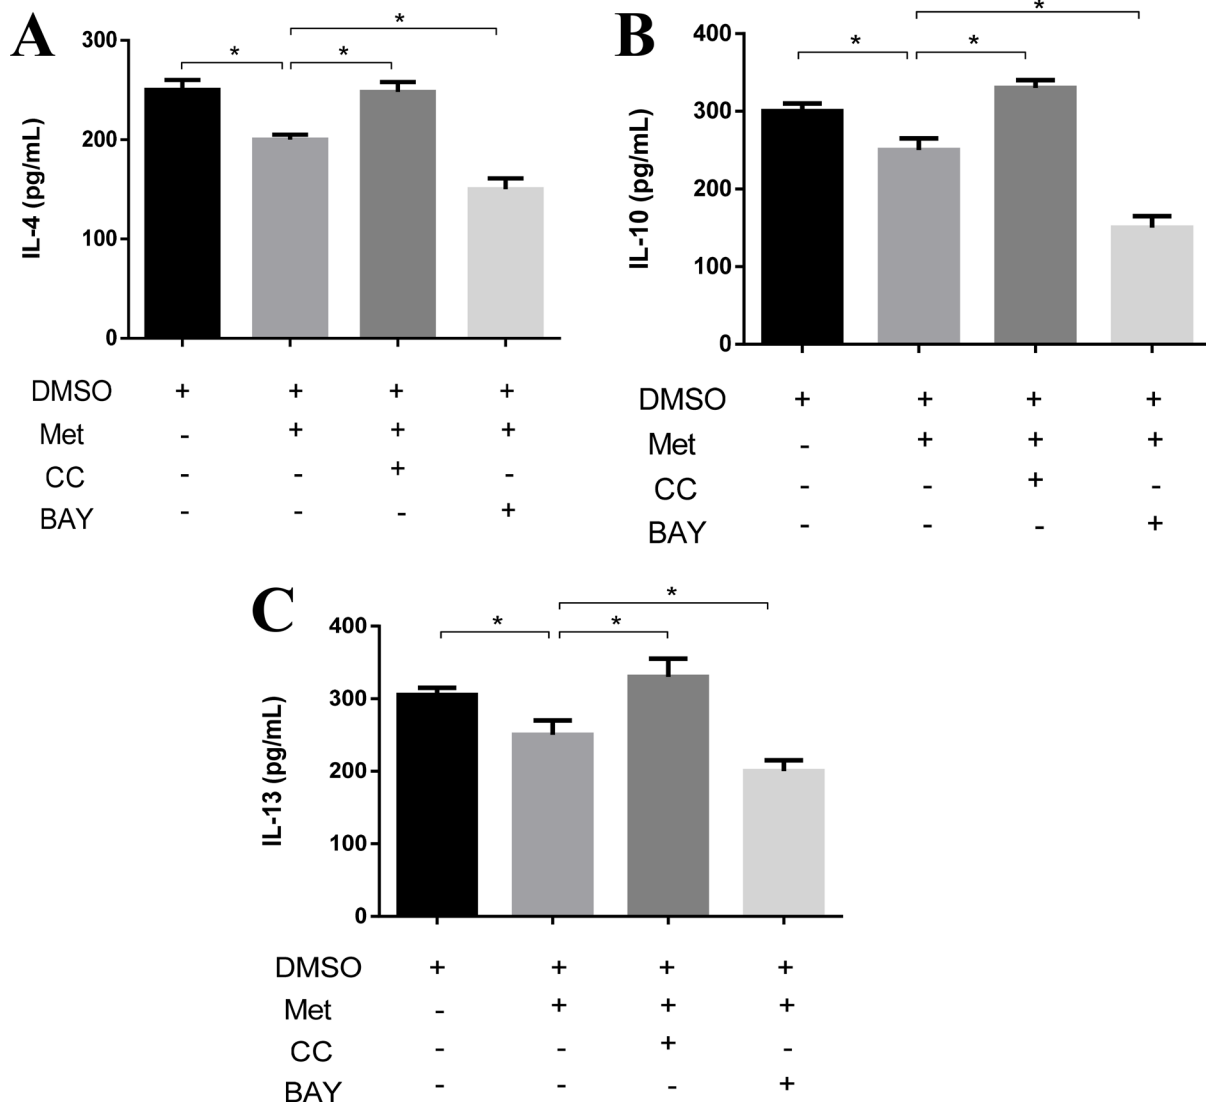

**Supplementary Figure 3: Metformin treatment activated AMPK and inhibited NF- $\kappa$ B signaling in cancer cells.** Breast cancer cells (MDA-MB231) were treated with metformin 60  $\mu$ M for 6 h. After metformin incubation with an AMPK inhibitor (Compound C, CC) or NF- $\kappa$ B inhibitor (BAY-117082, BAY), the secretion of IL-4, IL-10 and IL-13 from breast cancer cells was measured by ELISA (A–C). Data are expressed as mean  $\pm$  SD, \* $p$  < 0.05. DMSO: control; Met: metformin. Representative ELISA data shown are from experiments independently performed at least three times.

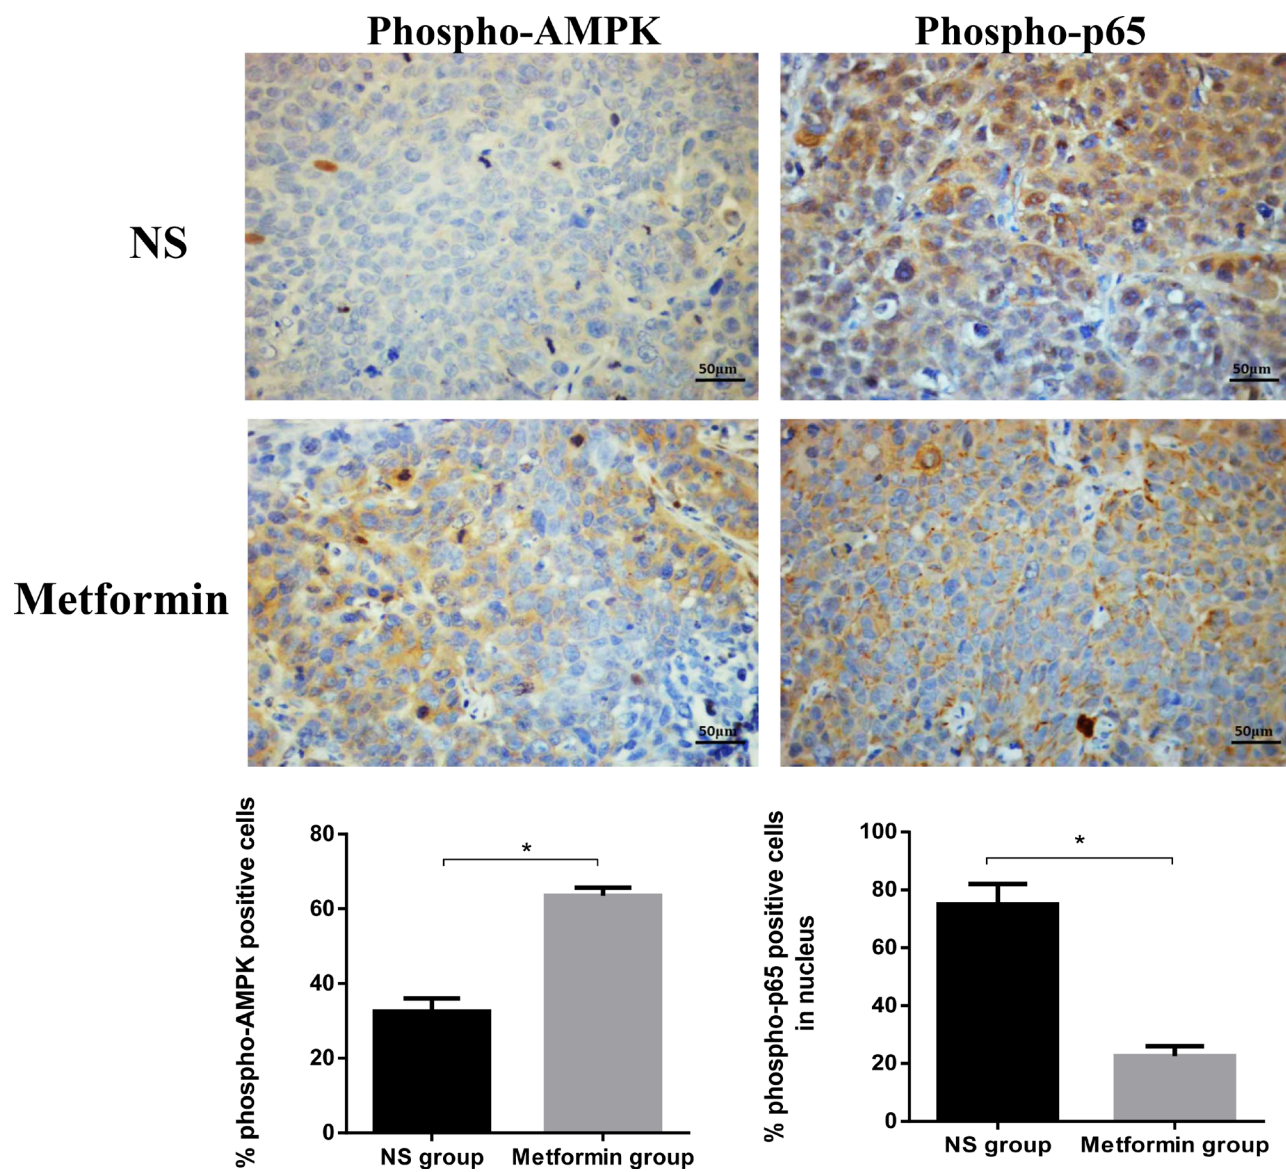

**Supplementary Figure 4: Administration of metformin affected tumor growth and TAM polarization in a xenograft model.** Schematic diagram of the xenograft model experimental process (A). The tumor tissues were removed and subjected to immunohistochemistry (IHC) analysis. The infiltrated macrophages were analyzed for phospho-AMPK and phospho-p65. Scale bar 50 μm. Data are expressed as mean ± SD, \* $p < 0.05$ . NS: normal saline. Representative data shown are from experiments independently performed at least three times.
